# Supplementary material for: Structural basis for broad anti-phage immunity by DISARM
Source: PubMed Central journal article supplement (PMC9142583; doi:10.1038/s41467-022-30673-1), 2022-05-27

## **Supplementary Information**

Jack P. K. Bravo, Cristian Aparicio-Maldonado, Franklin L. Nobrega, Stan J. J. Brouns,  
and David W. Taylor

**Supplementary Table 1 | Cryo-EM data collection, refinement, and validation statistics.**

|                                                     | <b>DrmAB-ADP</b><br>(PDB 7S9V,<br>EMD-24938) | <b>DrmAB-ADP-<br/>DNA</b> | <b>DrmAB</b> |
|-----------------------------------------------------|----------------------------------------------|---------------------------|--------------|
|                                                     |                                              | (PDB 7S9W,<br>EMD-24939)  |              |
| <b>Data collection and processing</b>               |                                              |                           |              |
| Magnification                                       | 45,000                                       |                           |              |
| Voltage (kV)                                        | 300 kV                                       |                           |              |
| Electron exposure (e <sup>-</sup> /Å <sup>2</sup> ) | 80                                           |                           |              |
| Defocus range (μm)                                  | -1.5 to -2.5                                 |                           |              |
| Pixel size (Å)                                      | 1.1                                          |                           |              |
| Symmetry imposed                                    | C1                                           |                           |              |
| Initial particle images (no.)                       | 4,669,932                                    |                           | 1,540,419    |
| Final particle images (no.)                         | 120,119                                      | 121,764                   | 148,062      |
| Map resolution (Å) at 0.143 FSC threshold           | 3.31                                         | 3.41                      | 3.84         |
| Map resolution range (Å)                            | 3.1 to 4.3                                   | 3.3 to 4.5                | 3.6-6.8      |
| <b>Refinement</b>                                   |                                              |                           |              |
| Initial model used (PDB code)                       | NA                                           |                           |              |
| Model resolution (Å)                                | 3.6                                          | 3.8                       |              |
| FSC threshold                                       | 0.5                                          |                           |              |
| Map sharpening <i>B</i> factor (Å <sup>2</sup> )    | -136.8                                       | -151.1                    |              |
| Model composition                                   |                                              |                           |              |
| Non-hydrogen atoms                                  | 27680                                        | 28125                     |              |
| Protein residues                                    | 1808                                         | 1751                      |              |
| Nucleotides                                         | 0                                            | 7                         |              |
| Ligands                                             | 1                                            | 1                         |              |
| Mean <i>B</i> factors (Å <sup>2</sup> )             |                                              |                           |              |
| Protein                                             | 62.08                                        | 106.66                    |              |
| Nucleotides                                         | N/A                                          | 116.37                    |              |
| R.m.s. deviations                                   |                                              |                           |              |
| Bond lengths (Å)                                    | 0.002                                        | 0.002                     |              |
| Bond angles (°)                                     | 0.617                                        | 0.631                     |              |
| Validation                                          |                                              |                           |              |
| MolProbity score                                    | 1.52                                         | 1.53                      |              |
| Clashscore                                          | 3.27                                         | 3.34                      |              |
| Poor rotamers (%)                                   | 0                                            | 0                         |              |
| Ramachandran plot                                   |                                              |                           |              |
| Favored (%)                                         | 93.93                                        | 93.90                     |              |
| Allowed (%)                                         | 6.01                                         | 6.1                       |              |
| Disallowed (%)                                      | 0.6                                          | 0                         |              |

**Supplementary Table 2 | DNA oligos used for *in vitro* assays in this study.**

| <b>Oligo name</b>         | <b>Sequence (5'-3')</b>                                                                                 |
|---------------------------|---------------------------------------------------------------------------------------------------------|
| DNA stem loop             | TTTTTTTCATCGATGAGCACTGCTATTCCCTAGCAGTGCTCATC<br>GATGATTTTCATCGATGAGCGGTTTT                              |
| Methylated DNA stem loop* | TTTTTTTCAT <b>m</b> CGATGAGCACTGCTATTCCCTAGCAGTGCTCAT<br><b>m</b> CGATGATTTTCAT <b>m</b> CGATGAGCGGTTTT |
| Fluorescent DNA           | Cy5-ATTTTGACAGCCACATGGCTTGATGAGTGGCGCACTCGC<br>CAGCCTGAGCATGGCGAAAACCTCCAGTCTGCT                        |
| Unlabeled complement DNA  | AGCAGACTGGAGGAGTTTTCGCCATGCTCAGGCTGGCGAGTG<br>CGCCACTCATCAAGCCATGTGGGCTGTCAAAT                          |
| 5' block                  | GCCATGTGGGCTGTCAAAT                                                                                     |
| 3' block                  | AGCAGACTGGAGGAGTTTTC                                                                                    |

mC corresponds to 5-methyl-Cytosine.

**Supplementary Table 3 | DNA oligos used for cloning in this study.**

| Oligo name | Sequence (5' - 3')                                   | Used for: (in fw/rv couples)                                                                                   | fw/rv |
|------------|------------------------------------------------------|----------------------------------------------------------------------------------------------------------------|-------|
| BN1750     | TACTTCCAATCCAATGCAATGATCAT<br>CAATAACAAAACCTCCAG     | Clone <i>drmB</i> into plasmid 13SS using LIC cloning                                                          | fw    |
| BN1751     | TTATCCACTTCCAATGTTATTATTTAAA<br>AACCCCTTAAAAAATGCAGC | Clone <i>drmB</i> into plasmid 13SS using LIC cloning                                                          | rv    |
| BN1060     | TATATATACATATGACTGATAACAACA<br>AATCTAG               | Clone <i>drmA</i> into plasmid pACYC-Duet using RE cloning-NdeI                                                | fw    |
| BN1061     | ATATATATCTCGAGTCAATCCTCGTC<br>TTTCGTTG               | Clone <i>drmA</i> into plasmid pACYC-Duet using RE cloning-XhoI                                                | rv    |
| BN172      | AGATCTGCCATATGTATATCTCCTTC                           | Amplify pACYC-Duet backbone for cloning of <i>drmA</i> insert                                                  | rv    |
| BN2290     | GATCGCTGACGTCGGTACCCTCGAG<br>TC                      | Amplify pACYC-Duet backbone for cloning of <i>drmA</i> insert                                                  | fw    |
| BN1064     | TATATATACATATGATGGATGAACTC<br>TTAGATGC               | Clone <i>drmC</i> into plasmid pET-Duet using RE cloning-NdeI                                                  | fw    |
| BN1065     | ATATATATCTCGAGTTAAATCAGACT<br>AATGATATTTGTG          | Clone <i>drmC</i> into plasmid pET-Duet using RE cloning-XhoI                                                  | rv    |
| BN172      | AGATCTGCCATATGTATATCTCCTTC                           | Amplify pET-Duet backbone for cloning of <i>drmC</i> insert                                                    | rv    |
| BN2290     | GATCGCTGACGTCGGTACCCTCGAG<br>TC                      | Amplify pET-Duet backbone for cloning of <i>drmC</i> insert                                                    | fw    |
| BN3096     | CATACCCTATCTCATTGTTGAT                               | Create mutant DrmB- $\Delta$ DUF1998 in 13ss and in pCDF                                                       | fw    |
| BN3095     | TTATCATTACAGCATGGCATATCGGA<br>TAC                    | Create mutant DrmB- $\Delta$ DUF1998 in 13ss and in pCDF                                                       | rv    |
| BN3104     | TTATCATTATCGCATTGACATAGGTA<br>CAG                    | Create mutant <i>drmA</i> - $\Delta$ PA in pCDF                                                                | rv    |
| BN3105     | GAAGTTGAGTCTGGTGTAC                                  | Create mutant <i>drmA</i> - $\Delta$ PA in pCDF                                                                | fw    |
| BN3436     | TTGGTGCCCAGTAGCCTC                                   | Create mutant <i>drmA</i> - $\Delta$ loop in pACYC and pCDF                                                    | rv    |
| BN3437     | TTCGGCTGCTTCACGTGG                                   | Create mutant <i>drmA</i> - $\Delta$ loop in pACYC and pCDF                                                    | fw    |
| BN3377     | CAACACGACTGGTAGCCTGAATATAC                           | Amplify DNA from pCDF-Duet with <i>drmA</i> - $\Delta$ PA and clone into pACYC-Duet                            | rv    |
| BN3378     | GGACACCAAATTTATCAAGGACGATC                           | Amplify DNA from pCDF-Duet with <i>drmA</i> - $\Delta$ PA and clone into pACYC-Duet                            | fw    |
| BN3375     | GTATATTCAGGCTACCAGTCGTGTTG                           | Amplify DNA from synthetic block to clone in 13SS and pCDF-Duet for <i>drmA</i> mutants R1294A, V1296G, V1296W | fw    |
| BN3376     | GATCGTCCTTGATAAATTTGGTGTCC                           | Amplify DNA from synthetic block to clone in 13SS and pCDF-Duet for <i>drmA</i> mutants R1294A, V1296G, V1296W | rv    |
| BN3377     | CAACACGACTGGTAGCCTGAATATAC                           | Amplify vectors 13SS and pCDF-Duet DNA to insert amplified DNA of <i>drmA</i> mutants R1294A, V1296G, V1296W   | rv    |
| BN3378     | GGACACCAAATTTATCAAGGACGATC                           | Amplify vectors 13SS and pCDF-Duet DNA to insert amplified DNA <i>drmA</i> mutants R1294A, V1296G, V1296W      | fw    |

|        |                               |                                                                                                                                         |    |
|--------|-------------------------------|-----------------------------------------------------------------------------------------------------------------------------------------|----|
| BN3379 | GATGAACAGAACTTGAATGTGAGC      | Amplify DNA from synthetic block to clone in 13SS and pCDF-Duet for <i>drmA</i> mutants R569D, Q572D, K610D, R658D, R649A, K803A, R810A | rv |
| BN3380 | GATAATTAATCAGGCGGTCGGATA<br>G | Amplify DNA from synthetic block to clone in 13SS and pCDF-Duet for <i>drmA</i> mutants R569D, Q572D, K610D, R658D, R649A, K803A, R810A | fw |
| BN3381 | GCTCACATTCAAGTTCTGTTTCATC     | Amplify vectors 13SS and pCDF-Duet DNA to insert amplified DNA <i>drmA</i> mutants R569D, Q572D, K610D, R658D, R649A, K803A, R810A      | rv |
| BN3382 | CTATCCGACCGCCTGATTTAATTATC    | Amplify vectors 13SS and pCDF-Duet DNA to insert amplified DNA <i>drmA</i> mutants R569D, Q572D, K610D, R658D, R649A, K803A, R810A      | fw |

**Supplementary Table 4 | Plasmids used in this study.**

| Plasmid | Description                                                  | Name in paper | Antibiotic resistance marker | Source         |
|---------|--------------------------------------------------------------|---------------|------------------------------|----------------|
| pTU515  | 13SS- <i>drmB</i> fused to His-tag                           |               | Spectinomycin                | This paper     |
| pTU518  | 13SS- <i>drmB</i> - $\Delta$ DUF1998 fused to His-tag        |               | Spectinomycin                | This paper     |
| pTU516  | pACYC-Duet- <i>drmA</i>                                      |               | Chloramphenicol              | This paper     |
| pTU520  | pACYC-Duet- <i>drmA</i> ( $\Delta$ PA)                       |               | Chloramphenicol              | This paper     |
| pTU542  | pACYC-Duet- <i>drmA</i> ( $\Delta$ loop)                     |               | Chloramphenicol              | This paper     |
| pTU522  | pACYC-Duet- <i>drmA</i> (V1296G)                             |               | Chloramphenicol              | This paper     |
| pTU523  | pACYC-Duet- <i>drmA</i> (V1296W)                             |               | Chloramphenicol              | This paper     |
| pTU524  | pACYC-Duet- <i>drmA</i> (R569D)                              |               | Chloramphenicol              | This paper     |
| pTU525  | pACYC-Duet- <i>drmA</i> (Q572D)                              |               | Chloramphenicol              | This paper     |
| pTU526  | pACYC-Duet- <i>drmA</i> (K610D)                              |               | Chloramphenicol              | This paper     |
| pTU527  | pACYC-Duet- <i>drmA</i> (R658D)                              |               | Chloramphenicol              | This paper     |
| pTU528  | pACYC-Duet- <i>drmA</i> (R649A)                              |               | Chloramphenicol              | This paper     |
| pTU529  | pACYC-Duet- <i>drmA</i> (K803A)                              |               | Chloramphenicol              | This paper     |
| pTU530  | pACYC-Duet- <i>drmA</i> (R810A)                              |               | Chloramphenicol              | This paper     |
| pTU531  | pACYC-Duet- <i>drmA</i> (R1294A)                             |               | Chloramphenicol              | This paper     |
| pTU517  | pET-Duet- <i>drmC</i>                                        |               | Ampicillin                   | Reference (28) |
| pTU495  | pCDF-Duet- <i>drmABC</i>                                     |               | Streptomycin                 | Reference (28) |
| pTU519  | pCDF-Duet- <i>drmABC</i> with <i>drmB</i> - $\Delta$ DUF1998 |               | Streptomycin                 | This paper     |
| pTU521  | pCDF-Duet- <i>drmABC</i> with <i>drmA</i> ( $\Delta$ PA)     |               | Streptomycin                 | This paper     |
| pTU543  | pCDF-Duet- <i>drmABC</i> with <i>drmA</i> ( $\Delta$ loop)   |               | Streptomycin                 | This paper     |
| pTU532  | pCDF-Duet- <i>drmABC</i> with <i>drmA</i> (V1296G)           |               | Streptomycin                 | This paper     |
| pTU533  | pCDF-Duet- <i>drmABC</i> with <i>drmA</i> (V1296W)           |               | Streptomycin                 | This paper     |
| pTU534  | pCDF-Duet- <i>drmABC</i> with <i>drmA</i> (R569D)            |               | Streptomycin                 | This paper     |

|        |                                               |  |              |            |
|--------|-----------------------------------------------|--|--------------|------------|
| pTU535 | pCDF-Duet-drmABC<br>with <i>drmA</i> (Q572D)  |  | Streptomycin | This paper |
| pTU536 | pCDF-Duet-drmABC<br>with <i>drmA</i> (K610D)  |  | Streptomycin | This paper |
| pTU537 | pCDF-Duet-drmABC<br>with <i>drmA</i> (R658D)  |  | Streptomycin | This paper |
| pTU538 | pCDF-Duet-drmABC<br>with <i>drmA</i> (R649A)  |  | Streptomycin | This paper |
| pTU539 | pCDF-Duet-drmABC<br>with <i>drmA</i> (K803A)  |  | Streptomycin | This paper |
| pTU540 | pCDF-Duet-drmABC<br>with <i>drmA</i> (R810A)  |  | Streptomycin | This paper |
| pTU541 | pCDF-Duet-drmABC<br>with <i>drmA</i> (R1294A) |  | Streptomycin | This paper |

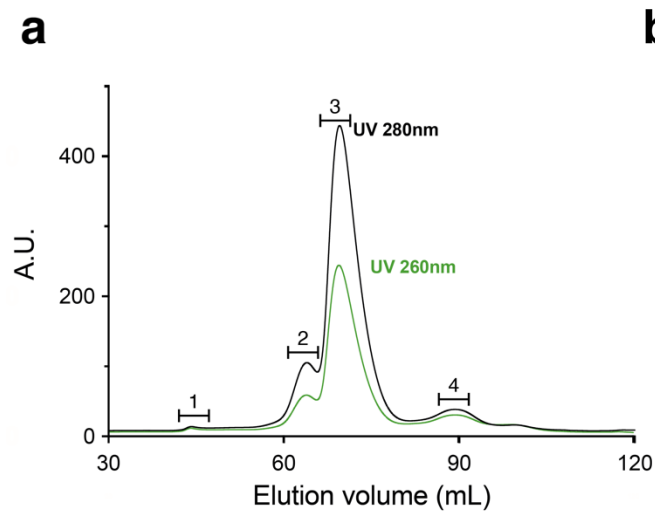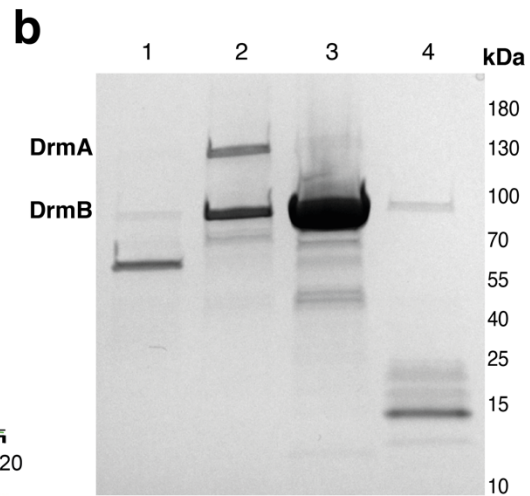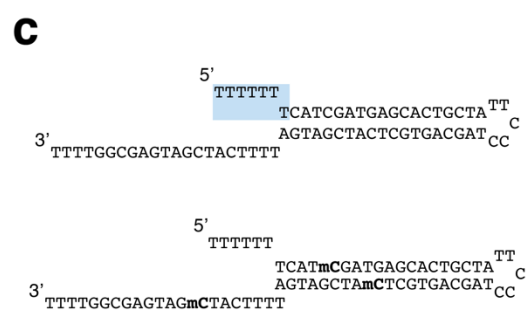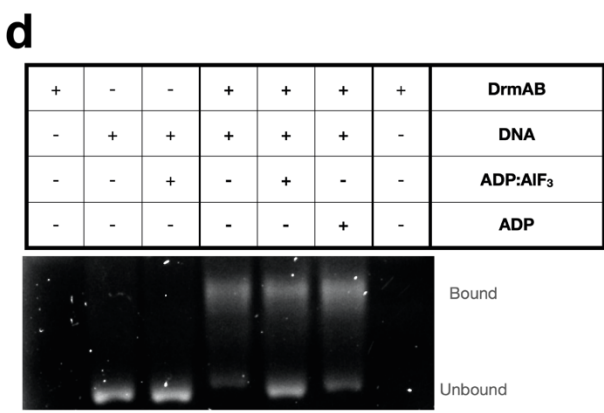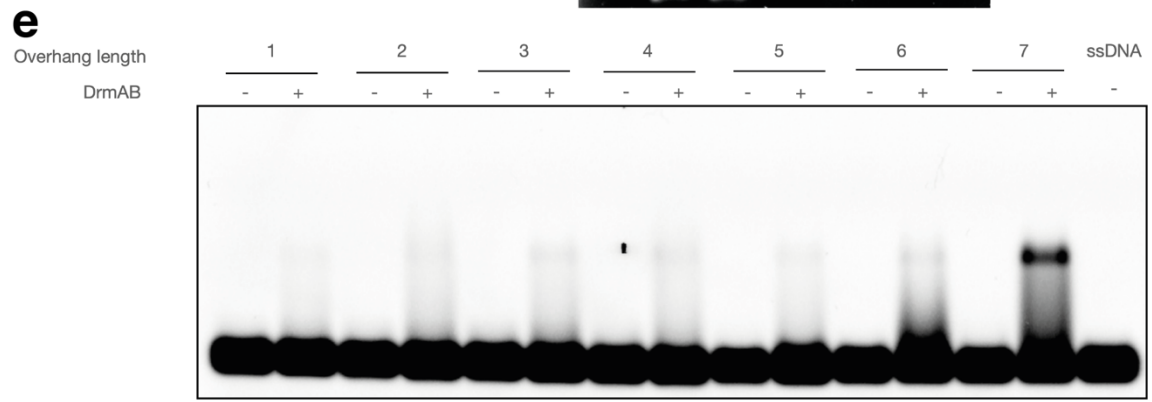

Fluorescent strand 5' -AGCAGAAATCTCTGCTGACGCATAAAGATGAGACGCTGGAGTACAAAACGTCAGCT-Cy3-3'

1 ovh complement 3' - CGTCTTTAGAGACGACTGCGTATTTCTACTCTGCGACCTCATGTTTGCAGTCGA-5'

2 ovh complement 3' - GTCTTTAGAGACGACTGCGTATTTCTACTCTGCGACCTCATGTTTGCAGTCGA-5'

3 ovh complement 3' - TCTTTAGAGACGACTGCGTATTTCTACTCTGCGACCTCATGTTTGCAGTCGA-5'

4 ovh complement 3' - CTTTAGAGACGACTGCGTATTTCTACTCTGCGACCTCATGTTTGCAGTCGA-5'

5 ovh complement 3' - TTTAGAGACGACTGCGTATTTCTACTCTGCGACCTCATGTTTGCAGTCGA-5'

6 ovh complement 3' - TTAGAGACGACTGCGTATTTCTACTCTGCGACCTCATGTTTGCAGTCGA-5'

7 ovh complement 3' - TAGAGACGACTGCGTATTTCTACTCTGCGACCTCATGTTTGCAGTCGA-5'



**Supplementary Fig. 1 | DNA binding by DrmAB.** **a**, Size-exclusion chromatogram of DrmAB complex. DrmB was tagged and used to pull down co-expressed DrmAB complex. Fractions 1 – 4 are analyzed in panel B. **b**, SDS PAGE analysis of DrmAB complex purified by size-exclusion chromatography. DrmAB assembles with a 1:1 DrmA:DrmB stoichiometry (fraction 2). Fraction 2 was used for subsequent structural and biochemical analysis. Representative of three independent experiments. Uncropped gel image is provided in **Supplementary Source Data 1**. **c**, Top: Secondary structure diagram of DNA stem-loop used for structural analyses (**Supplementary Table 2**). 5' region visible in cryo-EM reconstruction is denoted by orange box. Bottom: methylated DNA substrate used in ATPase assay **d**, Native gel shift assay used to determine sample preparation conditions for cryo-EM. 4  $\mu$ M DNA hairpin (**Supplementary Table 2**) was heat annealed and incubated with 10  $\mu$ M DrmAB in the absence or presence of 1 mM ADP or ADP:AlF<sub>3</sub>. Bound and free DNA were separated using EMSA. Representative of three independent experiments. Uncropped gel image is provided in **Supplementary Source Data 2**. **e**, EMSA of binding Cy5-labelled DNA with increasing overhang length by annealing complementary DNA of decreasing lengths. Binding is first observed when a length of 7-nt is present. Substrates used in successive overhang binding assay are shown below. Representative of three independent experiments. Uncropped gel image is provided in **Supplementary Source Data 3**.

**a**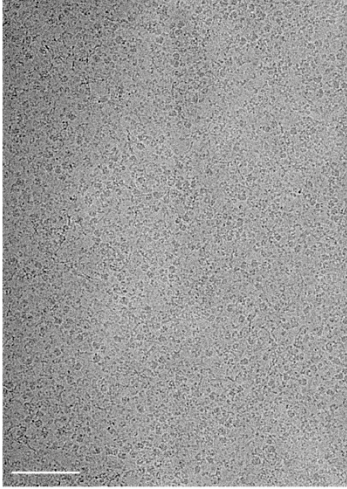**b**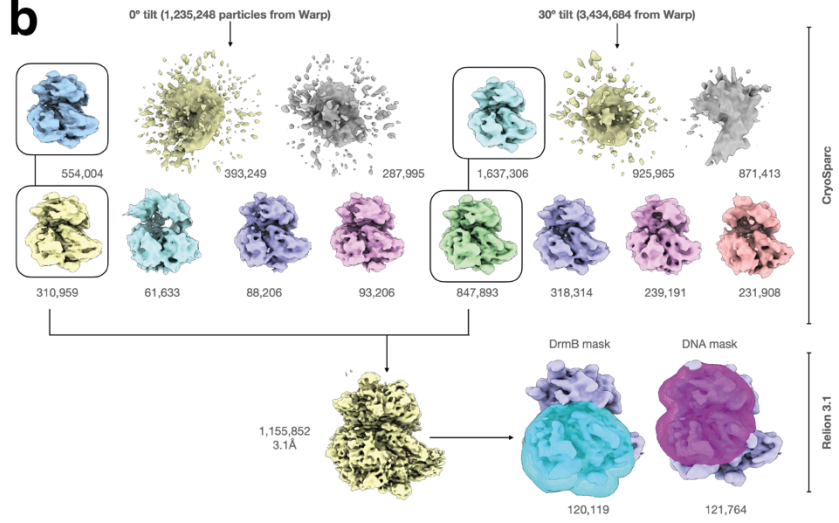**c**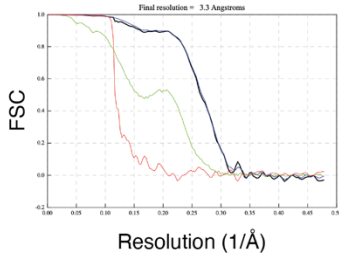**d**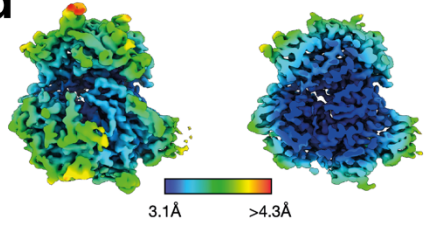**e**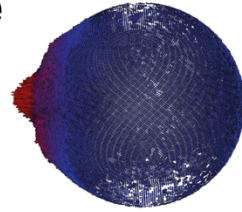**f**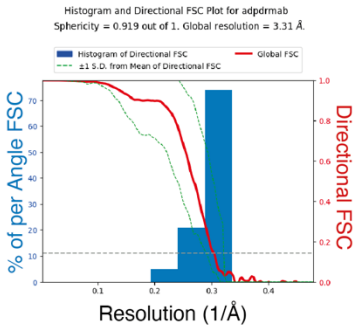**g**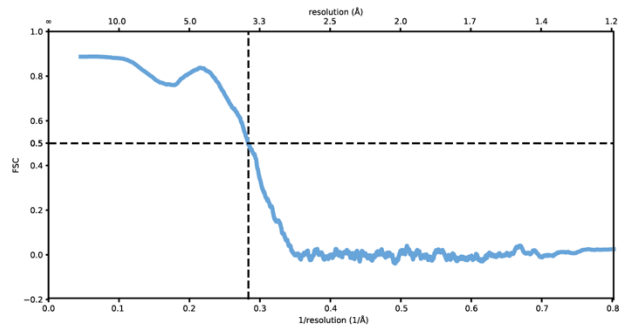**h**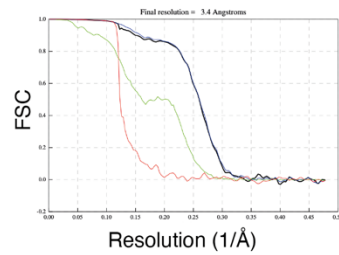**i**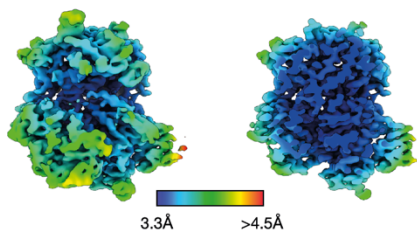**j**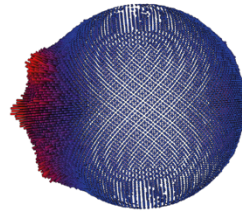**k**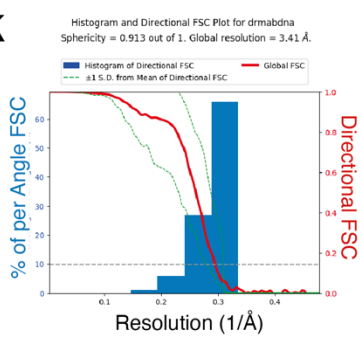**l**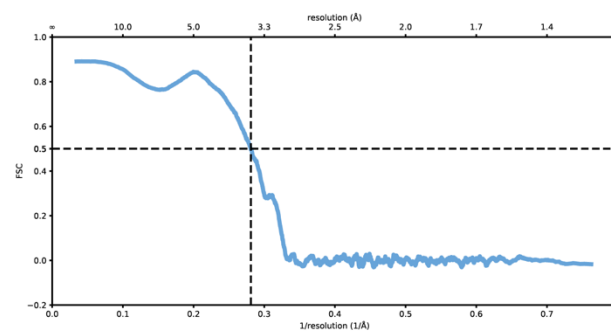

**Supplementary Fig. 2 | Cryo-EM data processing of DrmAB-ADP-DNA dataset.** **a**, Representative cryo-electron micrograph of DrmAB:ADP:DNA. Scale bar – 100 nm. Representative of ~9,000 raw micrographs. **b**, Data processing workflow detailing how tilted and untilted particle stacks were combined to a consensus reconstruction. While further classification of said reconstruction yielded a 2.8Å-resolution map, the quality of density corresponding to both ssDNA and DrmB N-terminal half were poor. To ameliorate this, focused 3D classification using either a DrmB mask or a DNA mask was used. **c**, Gold-standard Fourier shell correlation (FSC) curve for DrmAB:ADP. **d**, EM density map of DrmAB:ADP color-coded according to local resolution. **e**, Angular distribution plot calculated in Relion of DrmAB:ADP. **F**: Directional 3D FSC for DrmAB:ADP calculated by 3DFSC. **g**, Map-to-model FSC for DrmAB:ADP. **h**, Gold-standard Fourier shell correlation (FSC) curve for DrmAB:ADP:DNA. **I**: EM density map of DrmAB:ADP:DNA color-coded according to local resolution. **j**, Angular distribution plot calculated in Relion of DrmAB:ADP:DNA. **k**, Directional 3D FSC for DrmAB:ADP:DNA calculated by 3DFSC (Zi Tan et al., 2017). **l**, Map-to-model FSC for DrmAB:ADP:DNA.

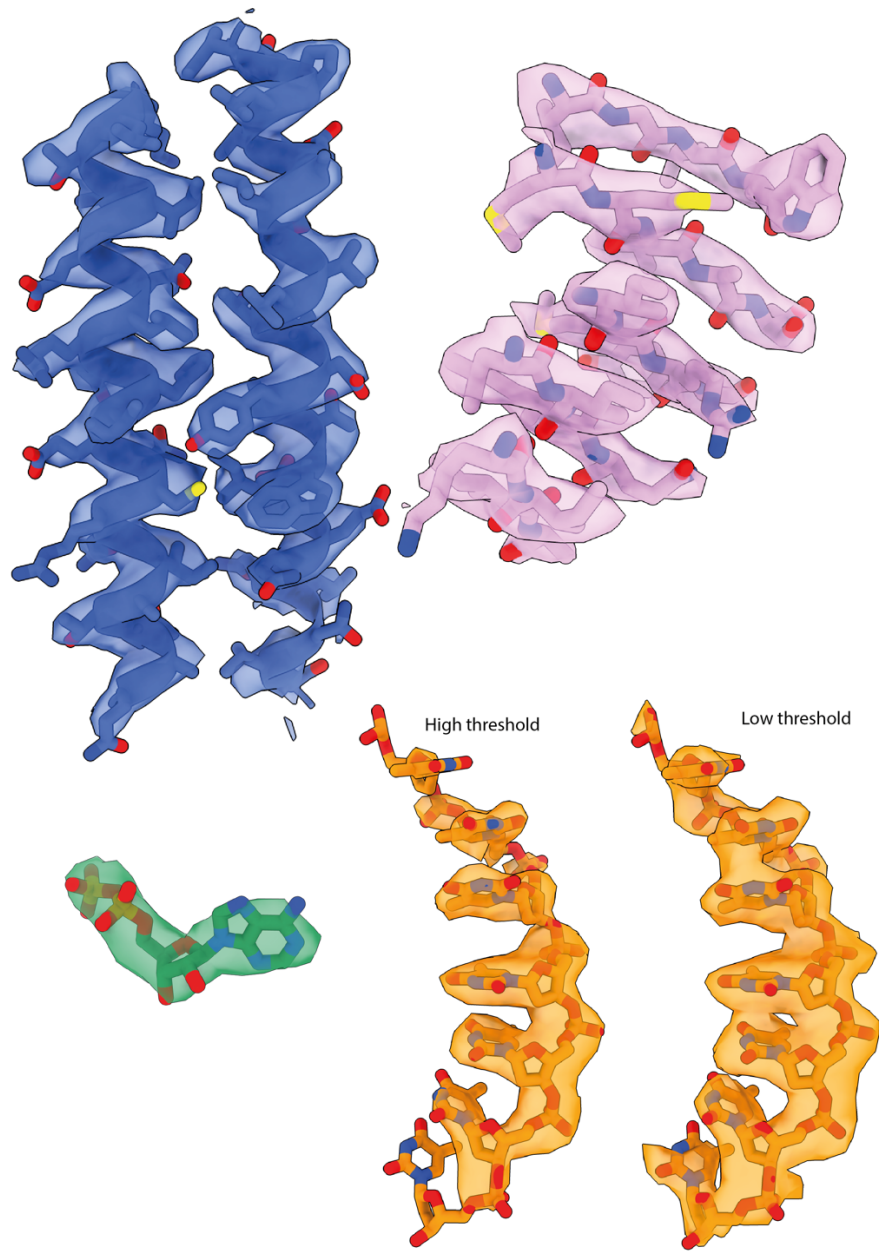

**Supplementary Fig. 3 | Representative regions of DrmAB:ADP:DNA map with corresponding models.** Blue:  $\alpha$ -helices, pink:  $\beta$ -sheet, green: ADP, orange: DNA. DNA is shown at two different thresholds to illustrate that bases within the center of the molecule are well-resolved, but peripheral bases are less well-resolved, but can still be modelled with confidence.

**a**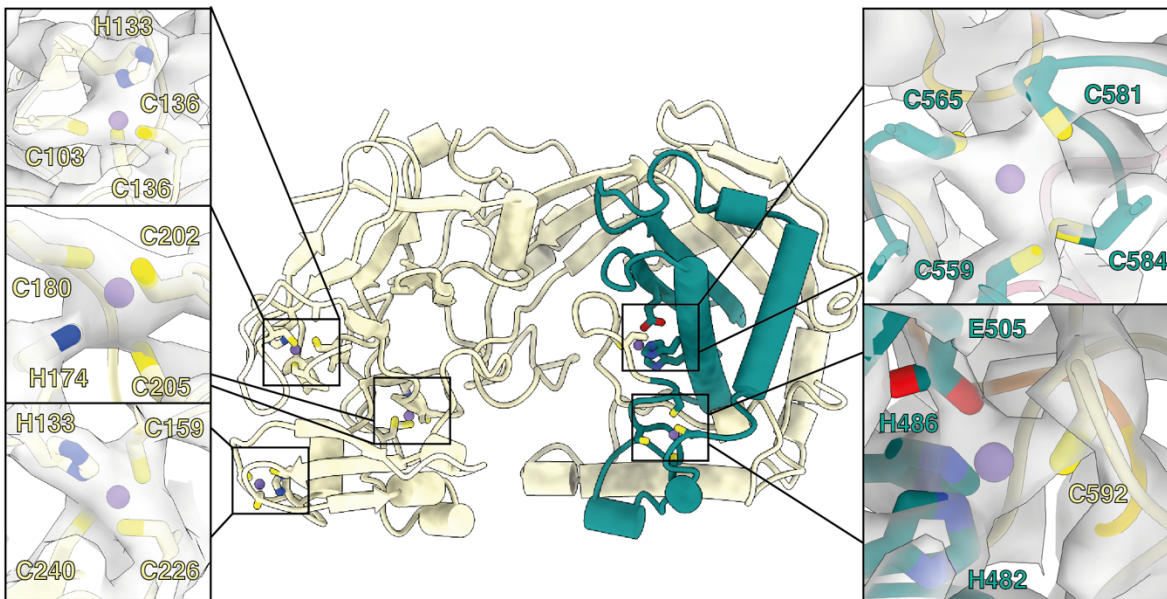**b**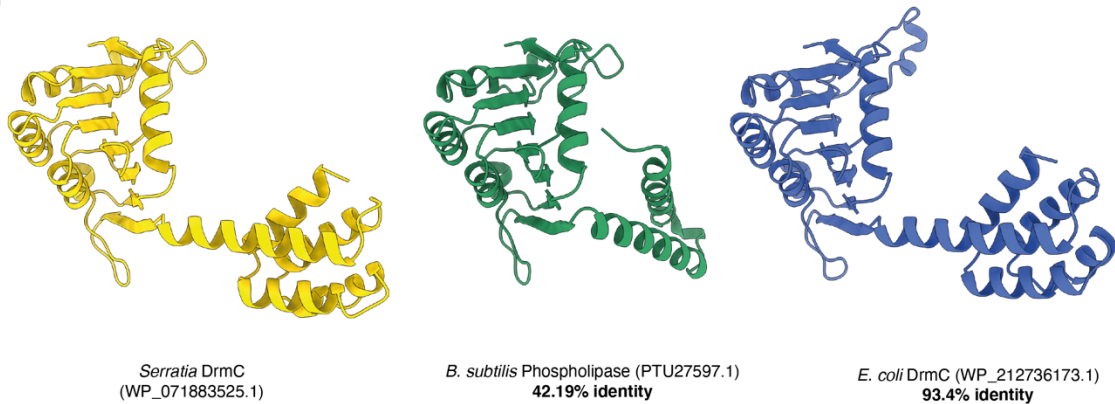

**Supplementary Fig. 4 | Structural analysis of DrmB and DrmC.** **a**, Multiple putative metal coordination sites within DrmB, with representative cryo-EM densities. **b**, Structural models of DrmC from *Serratia* (yellow), a *B. subtilis* PLD-nuclease protein homologue of DrmC (green) and an *E. coli* PLD-nuclease protein homologue of DrmC (blue). The DISARM operon in this study originated in *Serratia*, and *in vivo* assays were performed in *E. coli*. *B. subtilis* was the model organism used for *in vivo* assays in a previous DISARM study<sup>7</sup>. Structural models were generated using AlphaFold2.

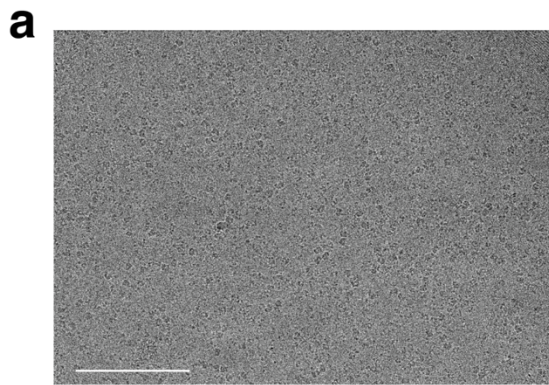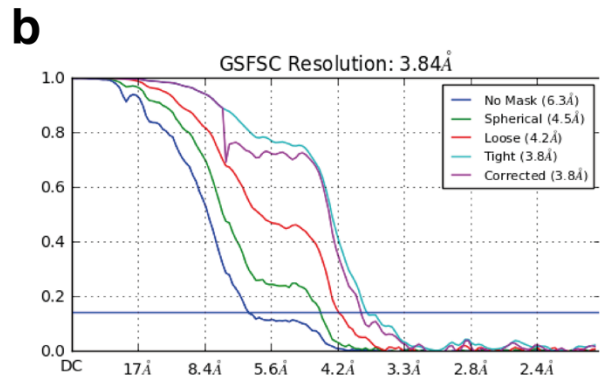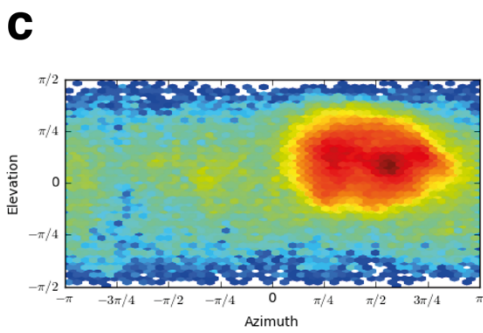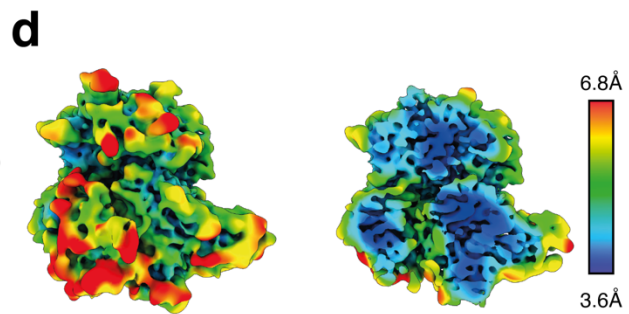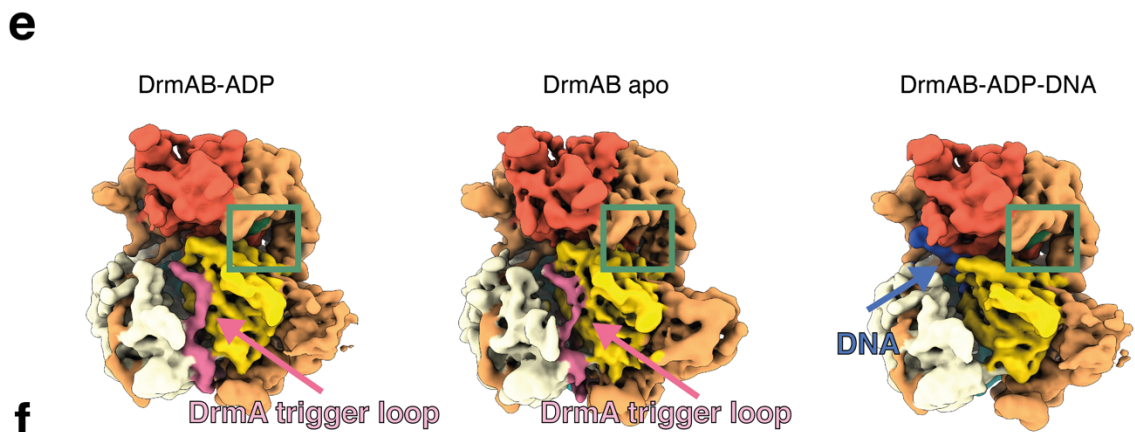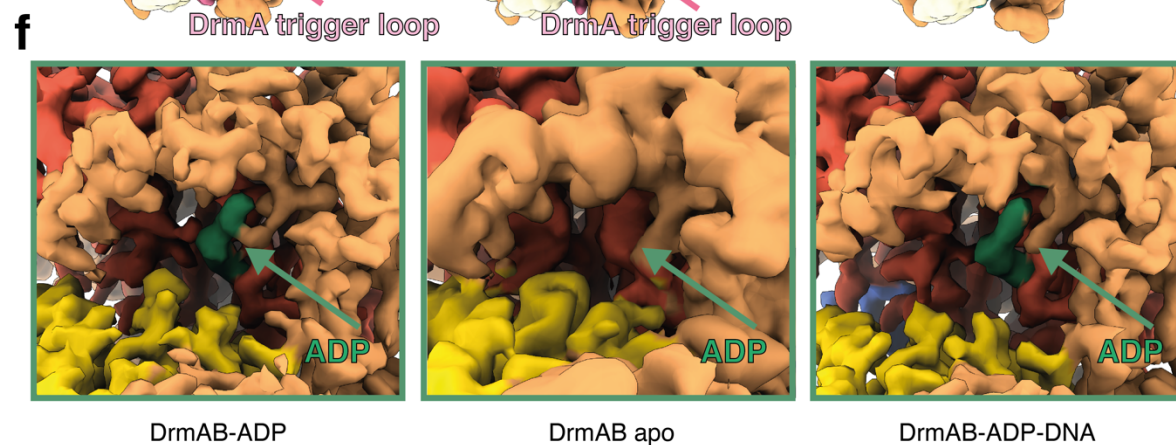

**Supplementary Fig. 5 | Structural features of DrmAB complex and TL.** **a**, Representative cryo-electron micrograph of DrmAB. Scale bar – 100 nm. Representative of ~1,700 raw micrographs. **b**, Gold-standard FSC curves for DrmAB. **c**, Angular distribution plot for DrmAB calculated in cryoSPARC. **d**, EM density map of DrmAB color-coded according to local resolution. **e**, Presence of TL EM density features within DrmAB:ADP, DrmAB, and DrmAB:ADP:DNA maps. TL is pink, and DNA is blue. Green box corresponds to ATP binding site. **f**, ATP-binding site within DrmA RecA domains. DrmAB apo complex contains no nucleotide density, but still contains TL density.

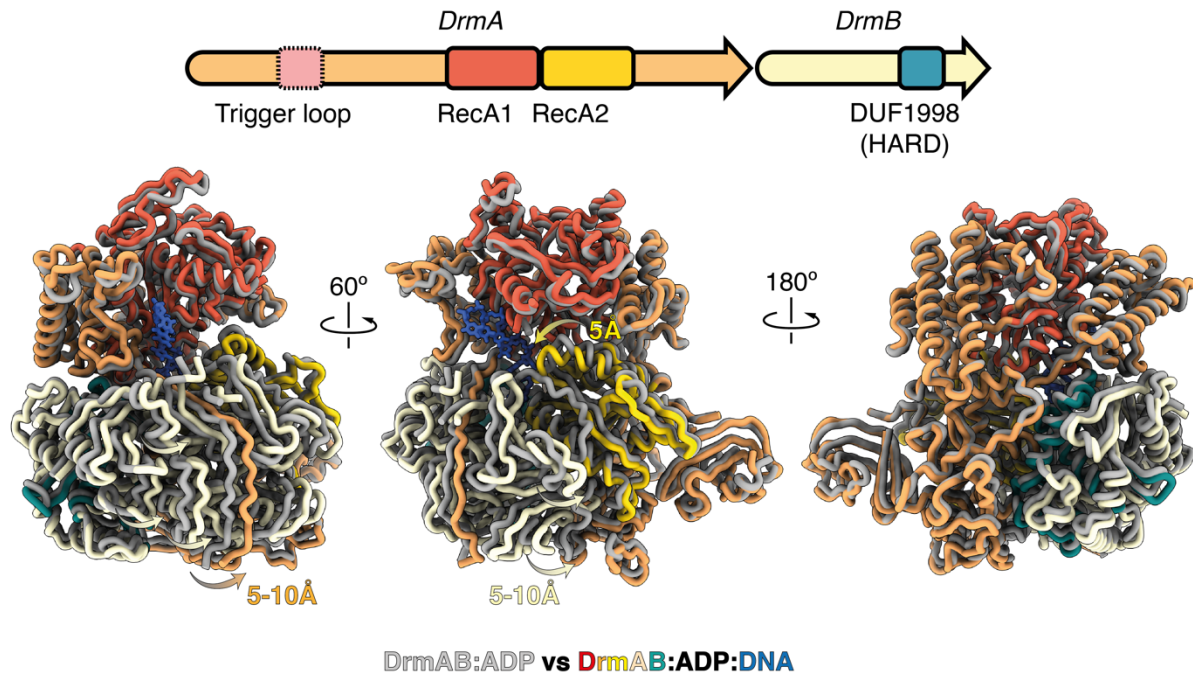

**Supplementary Fig. 6 | Conformational changes upon DNA binding.** **Top**, Domain architecture schematic of DrmA and DrmB. **Bottom**, DrmA:ADP:DNA colored as in the above schematic, and the DrmA:ADP complex colored in grey, showing conformational changes. DrmA trigger loop is absent in colored DrmA:ADP:DNA model since it likely becomes disordered or flexible upon DNA binding.



## Supplementary Source Data

**Supplementary Source Data 1.** Uncropped gel image for **Supplementary Fig. 1b.**

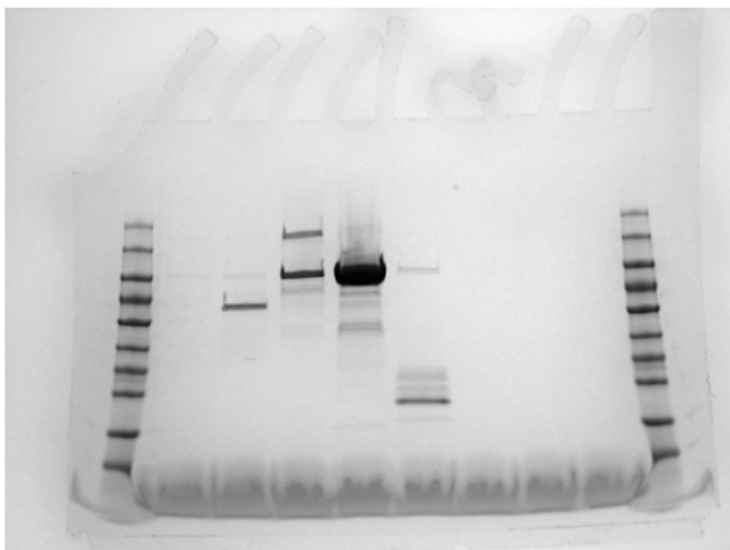

**Supplementary Source Data 2.** Uncropped gel image for **Supplementary Fig. 1d.**

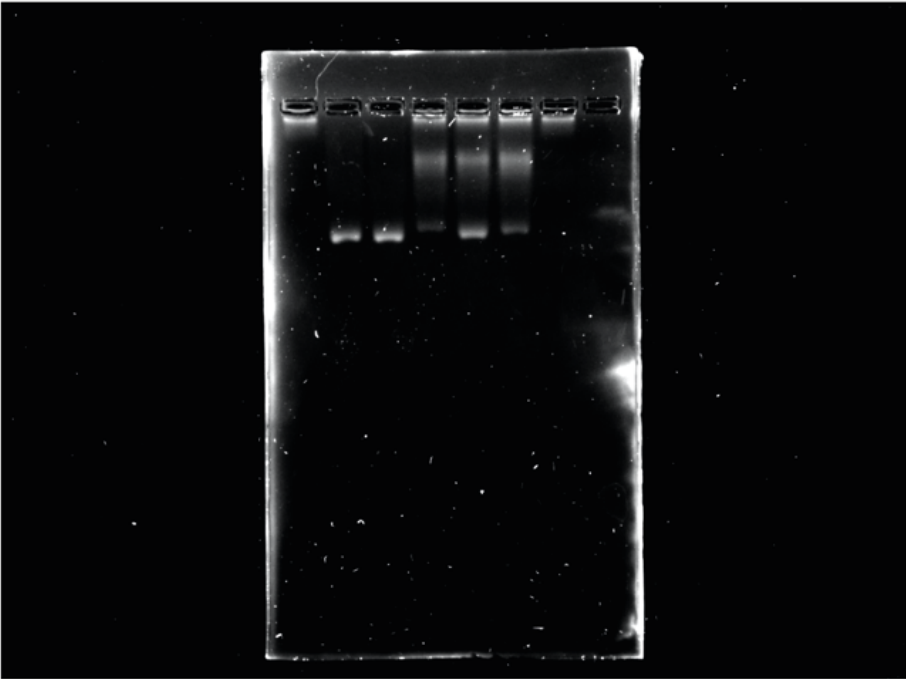

Supplementary Source Data 3. Uncropped gel image for Supplementary Fig. 1e.

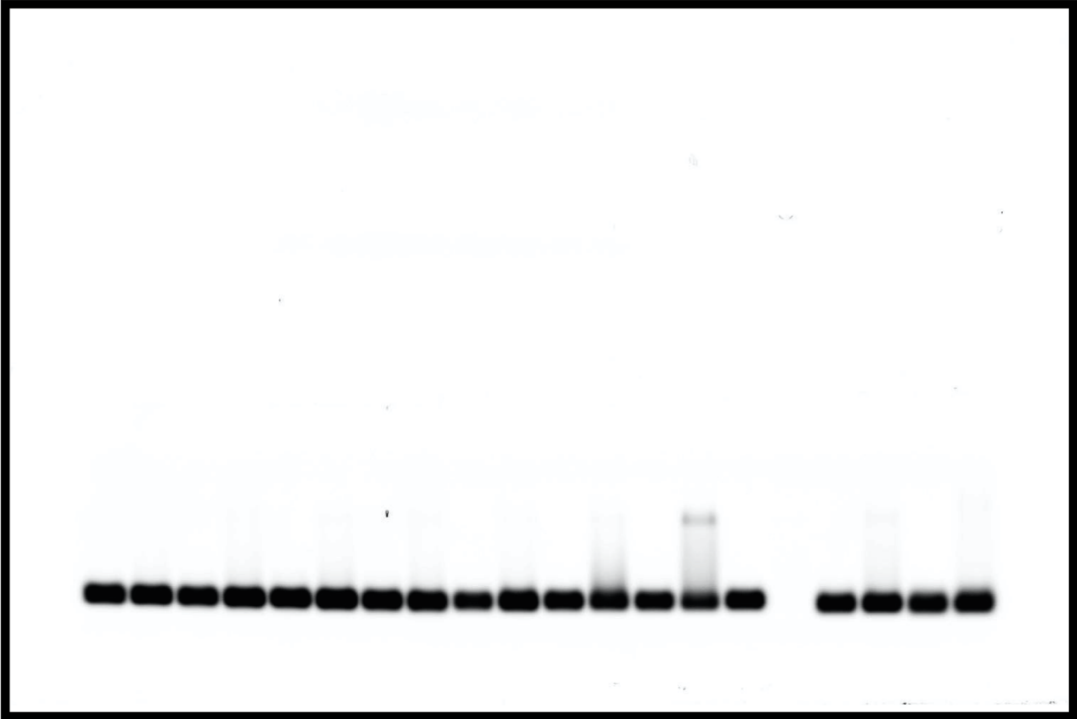

Supplement: 41467_2022_30673_MOESM1_ESM.pdf [file 41467_2022_30673_MOESM1_ESM.pdf]
